# Supplementary material for: Synthesis, Characterization, and Antitumor Mechanism Investigation of Ruthenium(II)/Rhenium(I)-Daminozide Conjugates
Source: MDPI journal article supplement (doi:10.3390/inorganics11040142), 2023-03-26
Supplement: s1 [file s1]

# Supporting Information

## Synthesis, Characterization, and Antitumor Mechanism Investigation of Ruthenium(II)/Rhenium(I)-Daminozide Conjugates

Pei-Xin Yang <sup>1,†</sup>, Kai Xie <sup>1,†</sup>, Mei-Ru Chen <sup>1</sup>, Zheng Zhang <sup>1</sup>, Bo Huang <sup>2,\*</sup>, Rong-Tao Li <sup>1</sup> and Rui-Rong Ye <sup>1,\*</sup>

<sup>1</sup> *Faculty of Life Science and Technology, Kunming University of Science and Technology,*

*Kunming 650500, China*

<sup>2</sup> *Faculty of Chemistry and Chemical Engineering, Yunnan Normal University, Kunming 650500,*

*China*

\* Corresponding author.

E-mail addresses: huangbo15@foxmail.com (B.H.); yerr@mail2.sysu.edu.cn (R.-R.Y.)

<sup>†</sup> These authors contributed equally to this work.

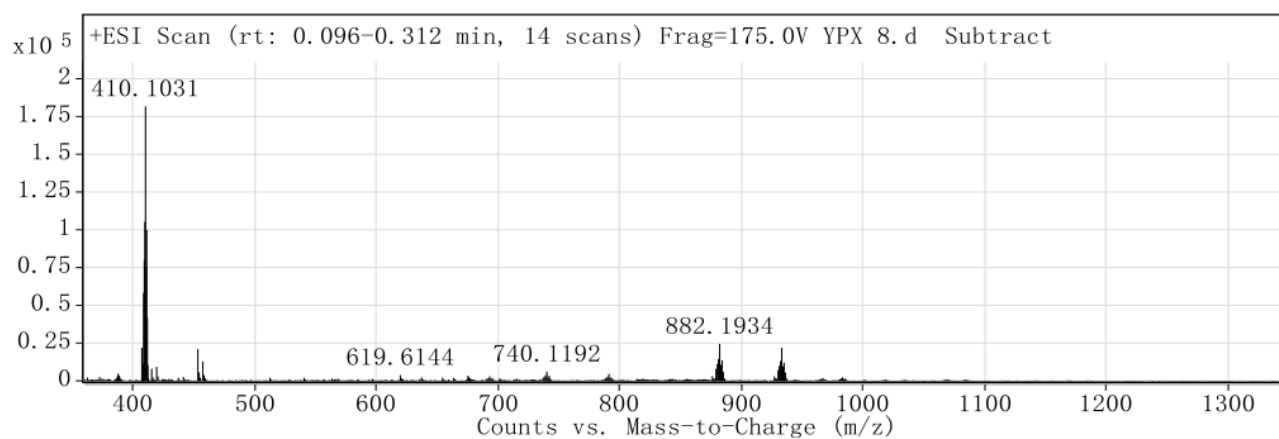

**Figure S1.** ESI-HRMS characterization of **Ru-1**, 965.1701 [M-PF<sub>6</sub>]<sup>+</sup>, 882.1934 [M-2PF<sub>6</sub>-H+2CH<sub>3</sub>OH]<sup>+</sup>, 410.1031 [M-2PF<sub>6</sub>]<sup>2+</sup>.

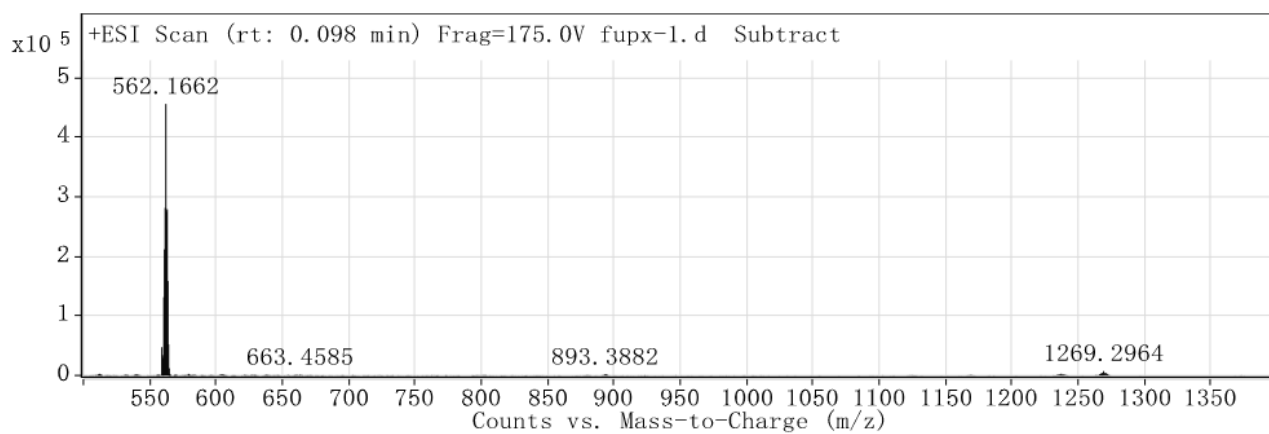

**Figure S2.** ESI-HRMS characterization of **Ru-2**, 1269.2964 [M-PF<sub>6</sub>]<sup>+</sup>, 562.1662 [M-2PF<sub>6</sub>]<sup>2+</sup>.

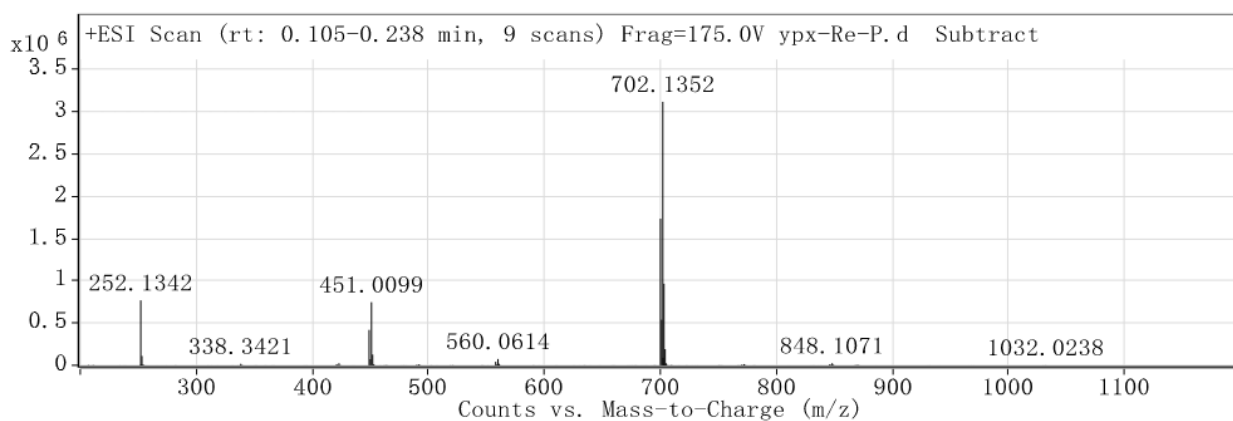

**Figure S3.** ESI-HRMS characterization of **Re-1**, 702.1352  $[\text{M-PF}_6]^+$ , 451.0099  $[\text{Re(phen)(CO)}_3]^+$ , 252.1342  $[\text{M-PF}_6\text{-Re(phen)(CO)}_3\text{+H}]^+$ .

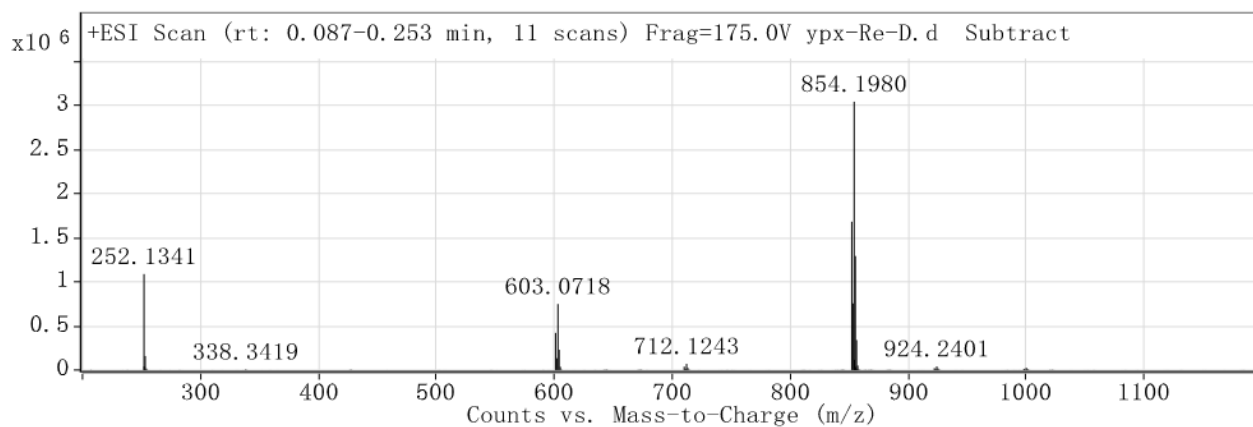

**Figure S4.** ESI-HRMS characterization of **Re-2**, 854.1980  $[\text{M-PF}_6]^+$ , 603.0718  $[\text{Re(DIP)(CO)}_3]^+$ , 252.1341  $[\text{M-PF}_6\text{-Re(DIP)(CO)}_3\text{+H}]^+$ .

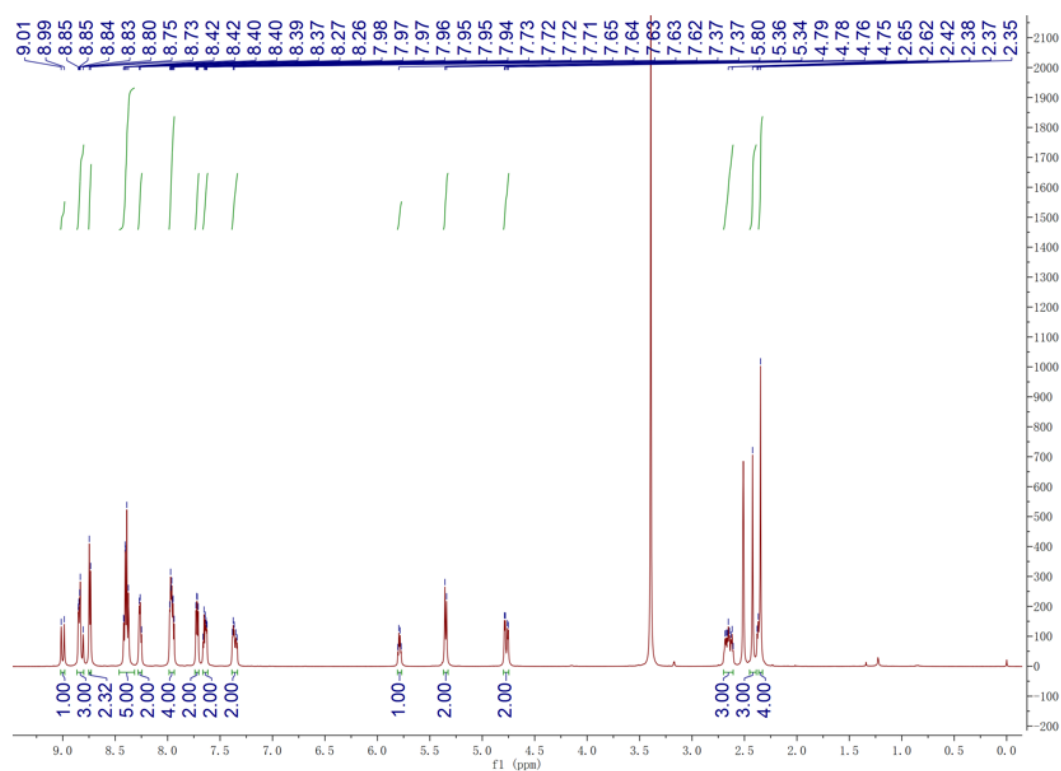

**Figure S5.  $^1\text{H}$  NMR spectrum of Ru-1.**

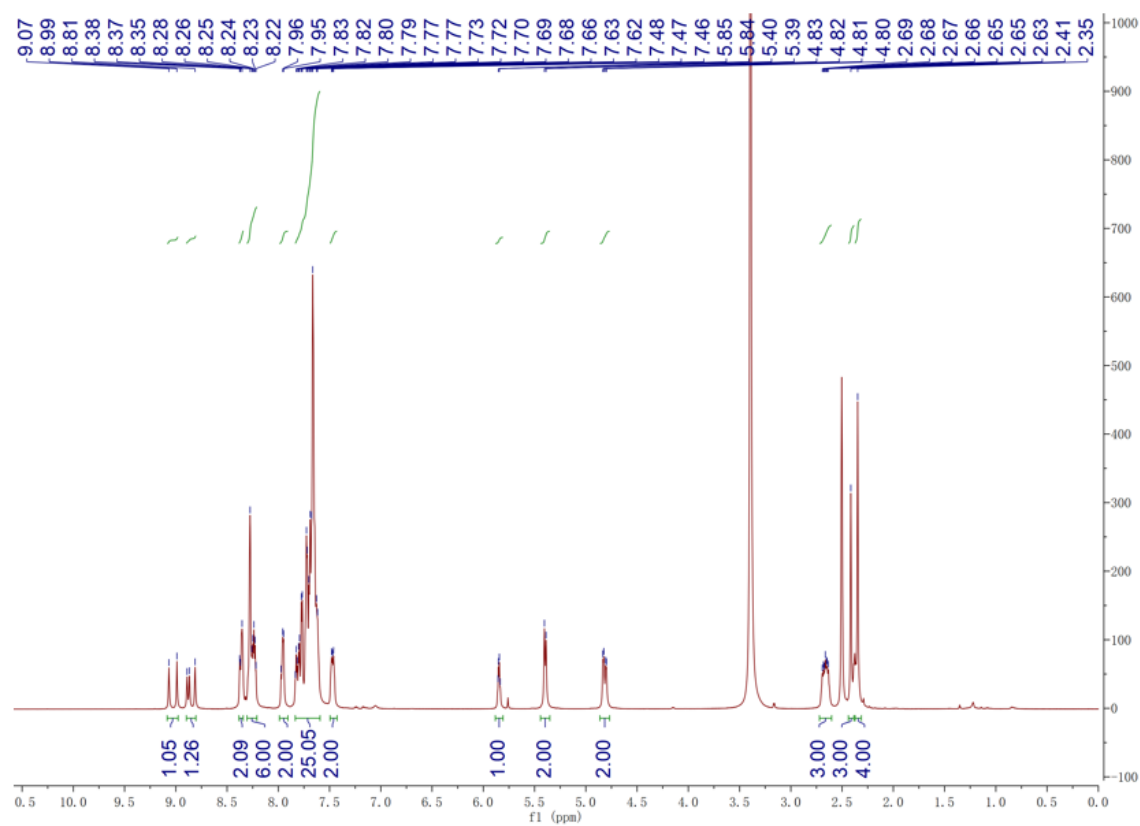

**Figure S6.  $^1\text{H}$  NMR spectrum of Ru-2.**

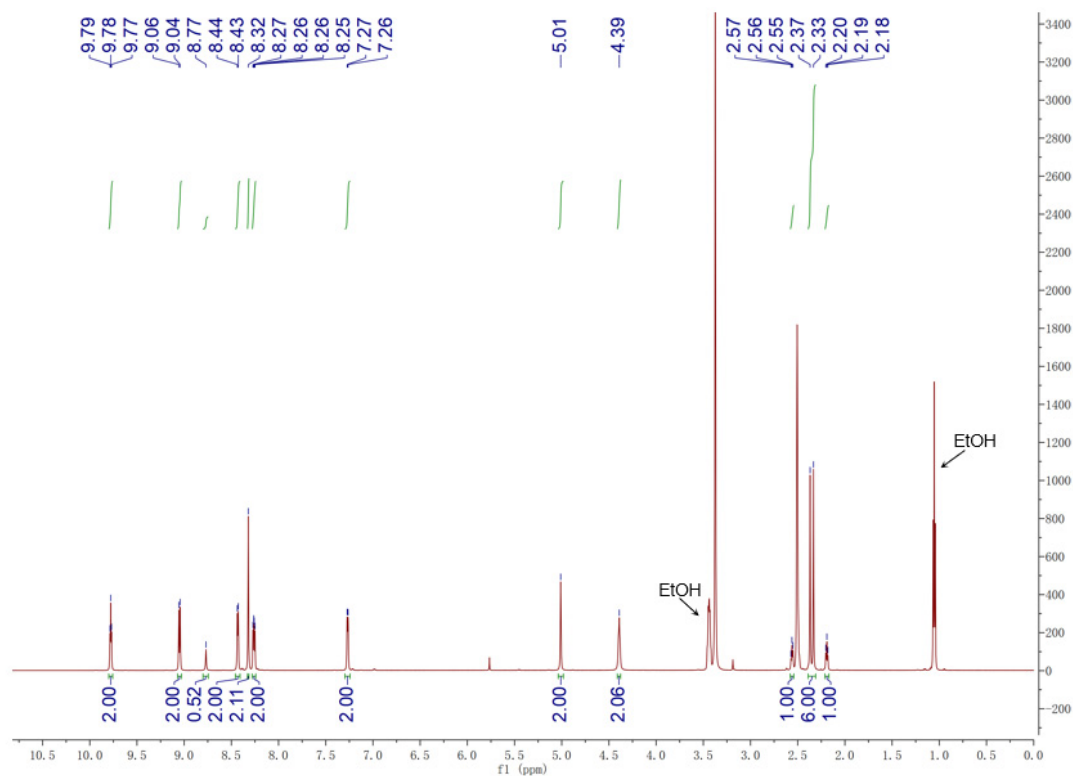

**Figure S7.**  $^1\text{H}$  NMR spectrum of **Re-1**.

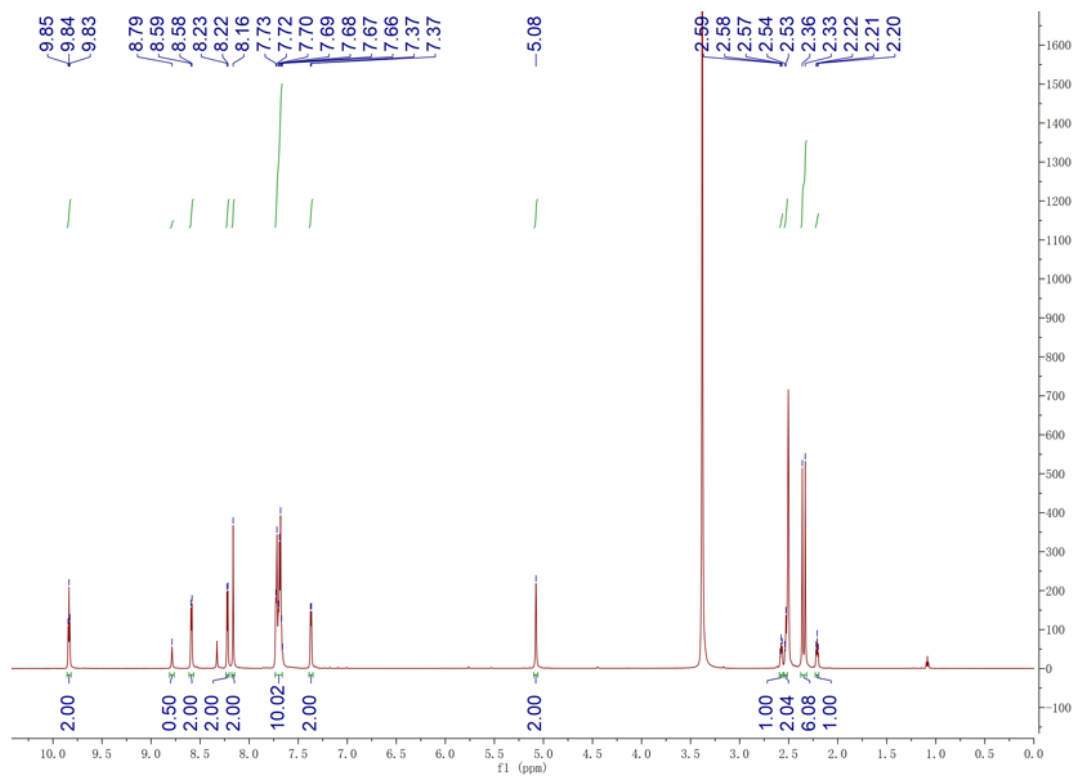

**Figure S8.**  $^1\text{H}$  NMR spectrum of **Re-2**.

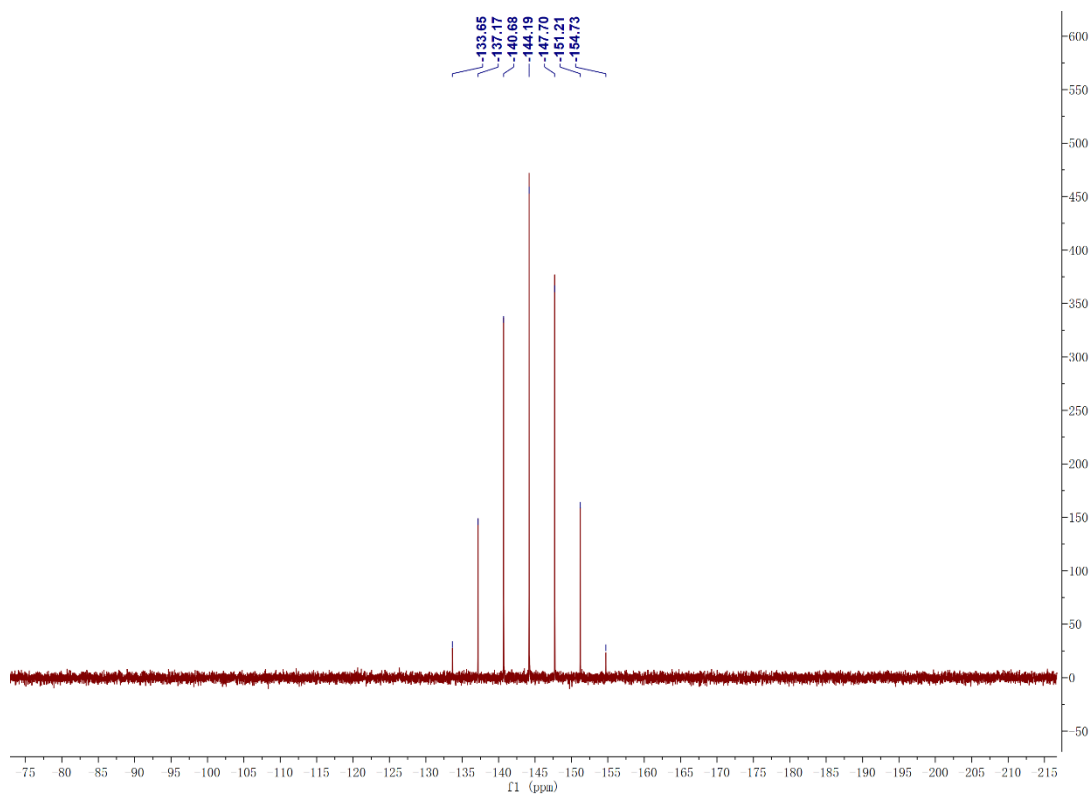

**Figure S9.**  $^{31}\text{P}$  NMR spectrum of **Ru-1**.

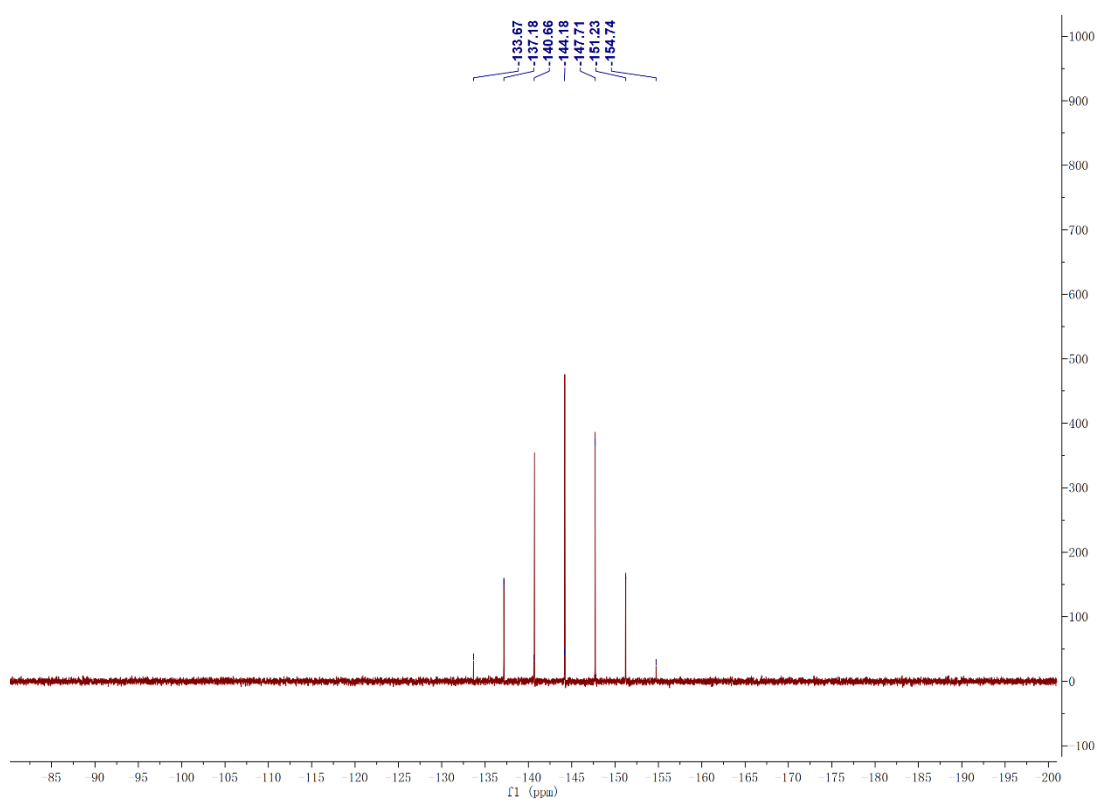

**Figure S10.**  $^{31}\text{P}$  NMR spectrum of **Ru-2**.

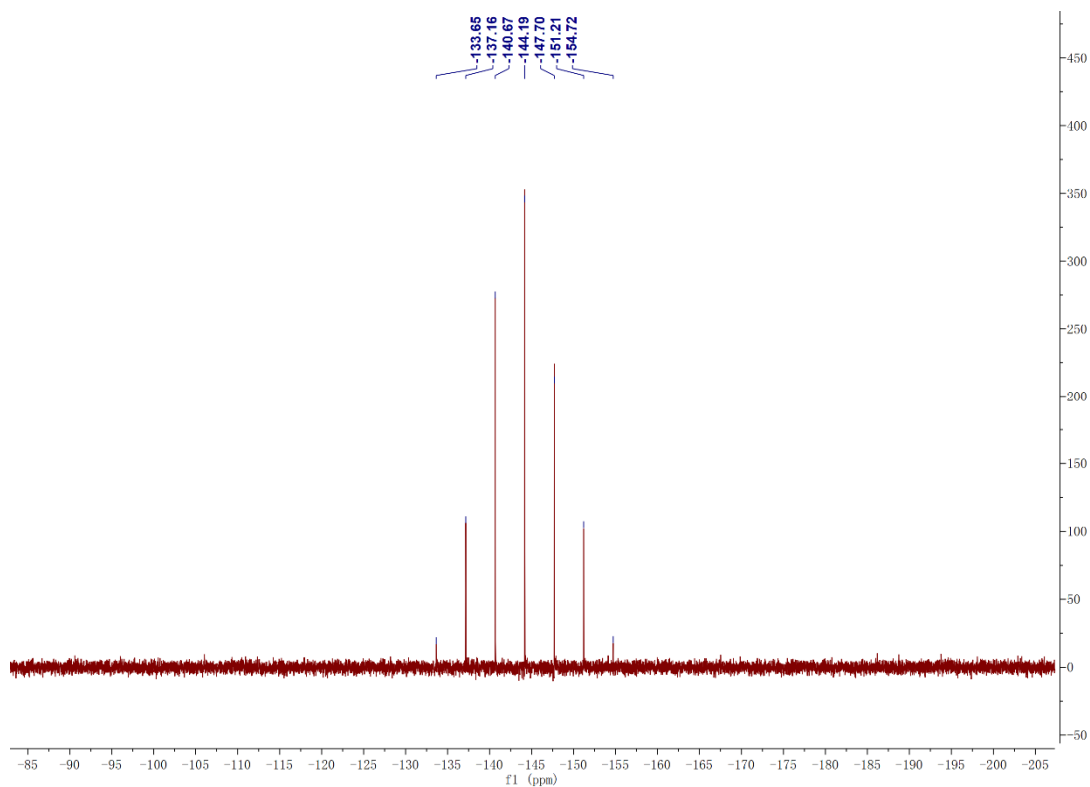

**Figure S11.**  $^{31}\text{P}$  NMR spectrum of **Re-1**.

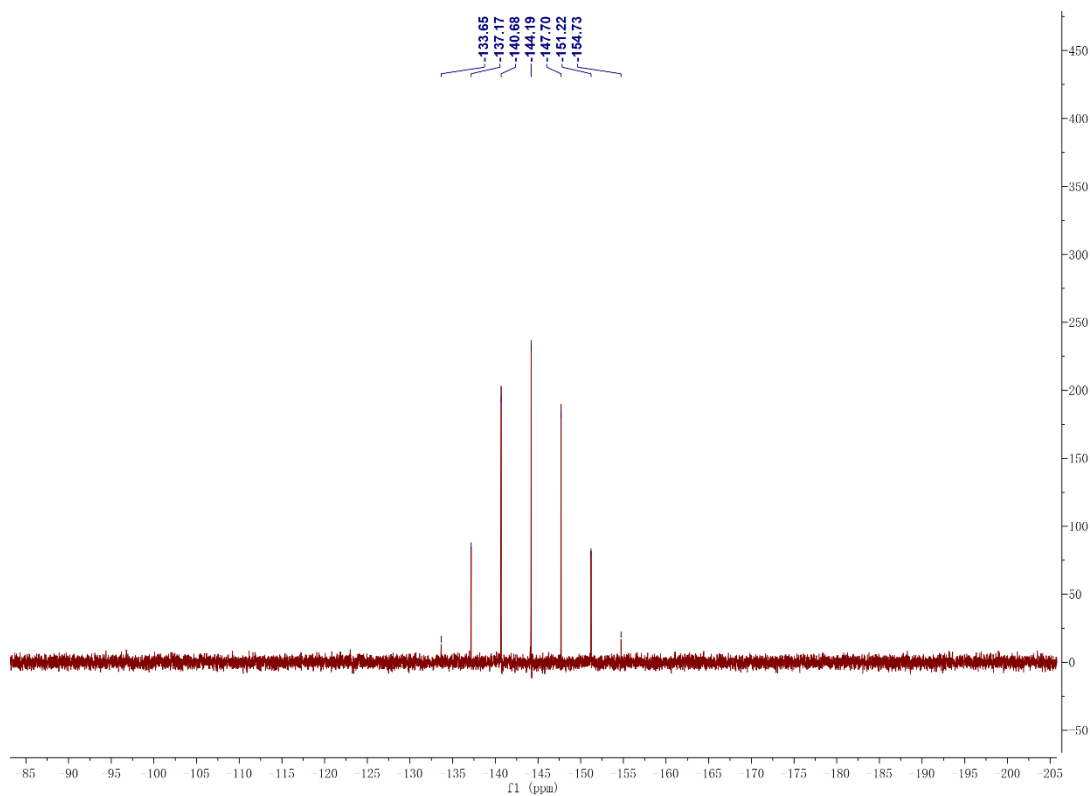

**Figure S12.**  $^{31}\text{P}$  NMR spectrum of **Re-2**.

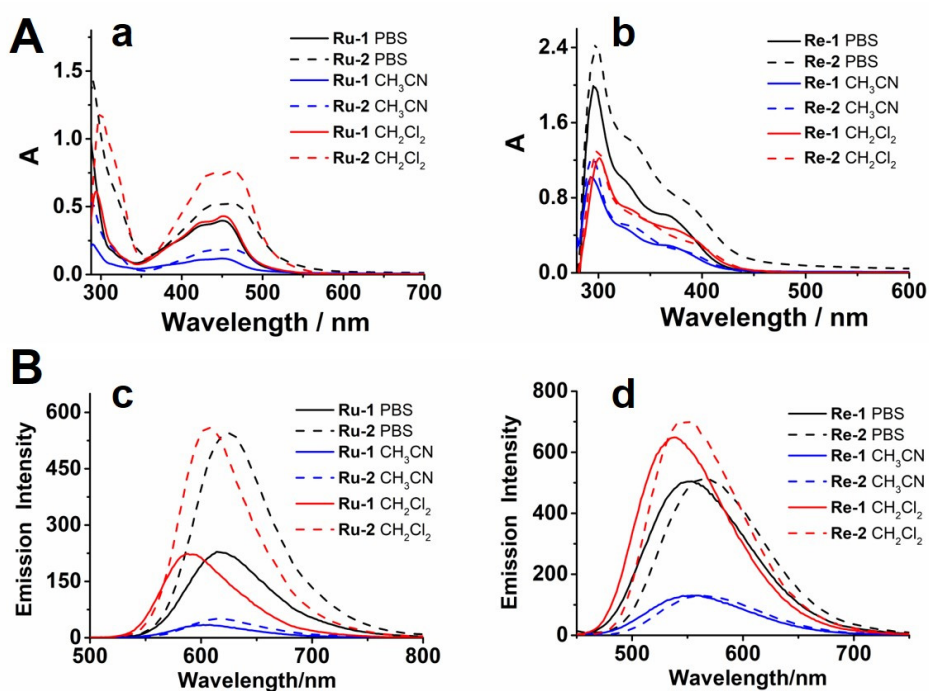

**Figure S13.** (A) UV/Vis spectra of Ru(II) (a) and Re(I) complexes (b) measured in PBS, CH<sub>3</sub>CN and CH<sub>2</sub>Cl<sub>2</sub> at 298 K. (B) Emission spectra of Ru(II) (a) and Re(I) complexes (b) measured in PBS, CH<sub>3</sub>CN and CH<sub>2</sub>Cl<sub>2</sub> at 298 K.

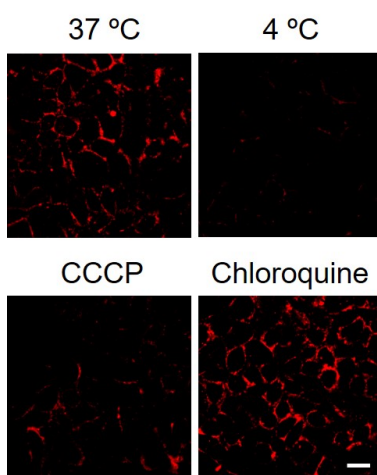

**Figure S14.** Cellular uptake mechanisms of **Ru-2**. HeLa cells were incubated with **Ru-2** (20  $\mu$ M, 2 h) under different conditions (37 °C, 4 °C, pre-treated HeLa cells with CCCP (30  $\mu$ M) or chloroquine (50  $\mu$ M)).



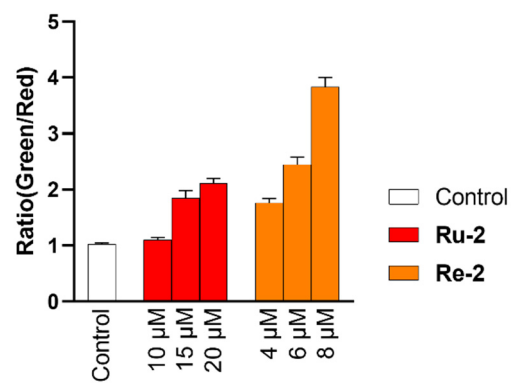

**Figure S15.** Ratio of green to red fluorescence intensity.

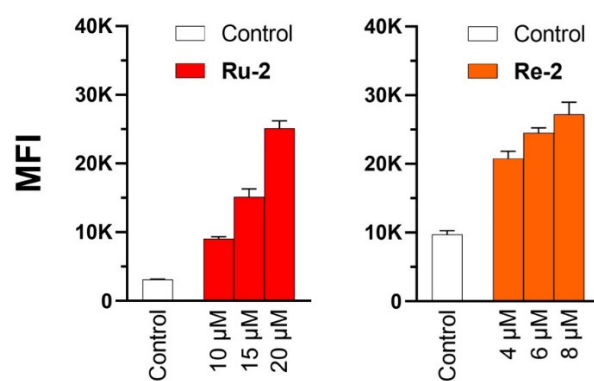

**Figure S16.** Quantitative data of MFI.

**Table S1.** Photophysical data of Ru(II) and Re(I) complexes

| Compounds   | Medium                          | $\lambda_{\text{abs, max}}$ (nm) | $\lambda_{\text{em, max}}$ (nm) |
|-------------|---------------------------------|----------------------------------|---------------------------------|
| <b>Ru-1</b> | PBS                             | 452                              | 616                             |
|             | CH <sub>3</sub> CN              | 454                              | 603                             |
|             | CH <sub>2</sub> Cl <sub>2</sub> | 454                              | 590                             |
| <b>Ru-2</b> | PBS                             | 460                              | 624                             |
|             | CH <sub>3</sub> CN              | 461                              | 616                             |
|             | CH <sub>2</sub> Cl <sub>2</sub> | 464                              | 606                             |
| <b>Re-1</b> | PBS                             | 367                              | 550                             |
|             | CH <sub>3</sub> CN              | 377                              | 553                             |
|             | CH <sub>2</sub> Cl <sub>2</sub> | 380                              | 537                             |
| <b>Re-2</b> | PBS                             | 388                              | 565                             |
|             | CH <sub>3</sub> CN              | 377                              | 562                             |
|             | CH <sub>2</sub> Cl <sub>2</sub> | 394                              | 547                             |
