# Supplementary material for: Synthesis, Characterization, and Antitumor Mechanism Investigation of Ruthenium(II)/Rhenium(I)-Daminozide Conjugates
Source: MDPI journal article supplement (doi:10.3390/inorganics11040142), 2023-03-26
Supplement: s1 [file s1]

Archive with 1 entries (1 files):
- inorganics-2304460-supplementary.pdf
